# Supplementary material for: State-of-the-art performance of deep learning methods for pre-operative radiologic staging of colorectal cancer lymph node metastasis: a scoping review
Source: HighWire-hosted journal article supplement (doi:10.1136/bmjopen-2024-086896), 2024-12-01
Supplement: bmjopen-2024-086896supp001_data_supplement.pdf [file bmjopen-2024-086896supp001_data_supplement.pdf]

Supplementary Material 1

Search Terms:

The academic databases were searched on the 1<sup>st</sup> February 2024 using the following search terms and restrictions.

Embase/MEDLINE:

Produced 54 results

|     |                                |
|-----|--------------------------------|
| 1.  | rectal                         |
| 2.  | colorectal                     |
| 3.  | cancer                         |
| 4.  | ai                             |
| 5.  | machine learning               |
| 6.  | artificial intelligence        |
| 7.  | deep learning                  |
| 8.  | lymph node                     |
| 9.  | mr                             |
| 10. | mri                            |
| 11. | ct                             |
| 12. | 1 or 2                         |
| 13. | 8 or 9                         |
| 14. | 4 or 5 or 6 or 7               |
| 15. | radiology                      |
| 16. | 10 or 11 or 12 or 16           |
| 17. | 3 and 13 and 14 and 15 and 17  |
| 18. | limit 18 to yr="2018 -Current" |
| 19. | limit 19 to english language   |
| 20. | limit 20 to full text          |
| 21. | remove duplicates from 21      |

Scopus:

( TITLE-ABS-KEY ( "rectal" ) OR TITLE-ABS-KEY ( "colorectal" ) ) AND TITLE-ABS-KEY ( "cancer" ) AND ( TITLE-ABS-KEY ( "artificial intelligence" ) OR TITLE-ABS-KEY ( "machine learning" ) OR TITLE-ABS-KEY ( "deep learning" ) ) AND ( TITLE-ABS-KEY ( "lymph node" ) AND ( TITLE-ABS-KEY ( "mr" ) OR TITLE-ABS-KEY ( "mri" ) OR TITLE-ABS-KEY ( "ct" ) OR TITLE-ABS-KEY ( "radiology" ) ) )

Restrictions: “2018-2024” and “Document type: Article or Review or Conference paper”

Produced 46 results

## IEE Xplore

("Full Text Only": rectal OR "Full Text Only": colorectal) AND ("Full Text Only": cancer) AND ("Full Text Only": artificial intelligence OR "Full Text Only": machine learning OR "Full Text Only": deep learning) AND ("Full Text Only": lymph node) AND ("Full Text Only": mr OR "Full Text Only": mri OR "Full Text Only": ct OR "Full Text Only": radiology)

Restrictions: "2018-2024" and "Filters: Journals or Conferences"

Produced 82 results

## Web of science:

(ALL=(rectal) OR ALL=(colorectal)) AND ALL=(cancer) AND (ALL=(artificial intelligence) OR ALL=(machine learning) OR ALL=(deep learning)) AND ALL=(lymph node) AND (ALL=(mr) OR ALL=(mri) OR ALL=(ct) OR ALL=(radiology))

Restrictions: "2018-2024"

Produced 55 results

## Google Scholar:

("colorectal" or "colon" or "rectal") and ("cancer") and ("ai" or ("artificial" and "intelligence") or ("deep" and "learning") or ("machine" and "learning")) and ("lymph" and "node") and ("mr" or "mri" or "ct" or "radiology")).

Restrictions: "2018-2024"

Note that Google Scholar was searched in a non-systematic way, the reviewer BGK selected studies to read the abstract based on the title whereas the abstracts were reviewed for all results on the other databases.
